# Supplementary material for: Mapping the conformational space accessible to catechol-O-methyltransferase
Source: PubMed Central journal article supplement (PMC4118827; doi:10.1107/s1399004714012917), 2014-07-25
Supplement: d-70-02163-sup1.pdf [file d-70-02163-sup1.pdf]

# Acta Crystallographica Section D

Volume 70 (2014)

Supporting information for article:

**Mapping the conformational space accessible to catechol-*O*-methyltransferase**

**Andreas Ehler, Jörg Benz, Daniel Schlatter and Markus G. Rudolph**

**Table S1** Crystallization conditions

| COMT Crystal                  | Human apo                                                    | Human apo single domain swap                                 | human apo double domain swap                                 | Mouse apo Phosphate                                                                                          | Rat apo Phosphate                                                                                                                       | Rat apo Sulphate                                                                             |
|-------------------------------|--------------------------------------------------------------|--------------------------------------------------------------|--------------------------------------------------------------|--------------------------------------------------------------------------------------------------------------|-----------------------------------------------------------------------------------------------------------------------------------------|----------------------------------------------------------------------------------------------|
| # / PDB-ID                    | <b>(1)</b> / 4PYI                                            | <b>(2)</b> / 4PYJ                                            | <b>(3)</b> / 4PYK                                            | <b>(4)</b> / 4P7F                                                                                            | <b>(5)</b> / 4P7G                                                                                                                       | <b>(6)</b> / 4P7J                                                                            |
| [Protein]                     | 11.1 mg/ml                                                   | 13.5 mg/ml                                                   | 11.9 mg/ml                                                   | 10.5 mg/ml                                                                                                   | 13 mg/ml                                                                                                                                | 13mg/ml                                                                                      |
| Protein buffer                | 50 mM HEPES/NaOH pH 7.0, 50 mM NaCl, 2 mM DTT, 1 mM EDTA     | 50 mM HEPES/NaOH pH 7.0, 50 mM NaCl, 2 mM DTT, 1 mM EDTA     | 50 mM HEPES/NaOH pH 7.0, 50 mM NaCl, 2 mM DTT, 1 mM EDTA     | 50 mM Tris/HCl pH 7.5, 50 mM NaCl, 10 mM DTT, 2 mM MgCl <sub>2</sub>                                         | 50 mM Tris/HCl pH 7.5, 50 mM NaCl, 10 mM DTT, 2 mM MgCl <sub>2</sub>                                                                    | 20 mM BisTris/HCl pH 6.2, 100 mM NaCl, 5 mM DTT, 5 mM MgCl <sub>2</sub>                      |
| Ligand                        | -                                                            | -                                                            | -                                                            | Phosphate <sup>1)</sup>                                                                                      | Phosphate <sup>1)</sup>                                                                                                                 | Sulphate <sup>1)</sup>                                                                       |
| Reservoir                     | 27.5% PEG 3350, 0.1M Tris/HCl pH 8.0, 0.2M MgCl <sub>2</sub> | 22.5% PEG 1500, 0.1M Tris/HCl pH 8.0, 0.2M MgCl <sub>2</sub> | 22.5% PEG 3350, 0.1M Tris/HCl pH 7.5, 0.2M MgCl <sub>2</sub> | 20% PEG 1000, 0.1M Na <sub>2</sub> HPO <sub>4</sub> -CitricAcid pH 4.2, 0.2M Li <sub>2</sub> SO <sub>4</sub> | 1.6M NaH <sub>2</sub> PO <sub>4</sub> / 0.4M K <sub>2</sub> HPO <sub>4</sub> , 0.1M Na <sub>2</sub> HPO <sub>4</sub> -CitricAcid pH 4.2 | 30% PEG 5000 MME, 0.1M MES/NaOH pH 6.5, 0.2M (NH <sub>4</sub> ) <sub>2</sub> SO <sub>4</sub> |
| Drop volume / protein content | 0.6ul / 75%                                                  | 0.6ul / 70%                                                  | 0.6ul / 60%                                                  | 0.4 ul / 75%                                                                                                 | 0.4ul / 75%                                                                                                                             | 0.4ul / 50%                                                                                  |
| Remarks                       | Seeding                                                      | Seeding                                                      | Seeding                                                      | -                                                                                                            | -                                                                                                                                       | -                                                                                            |

|                               |                                                                           |                                                                         |                                                                                 |                                                                             |                                                                      |                                                                                |
|-------------------------------|---------------------------------------------------------------------------|-------------------------------------------------------------------------|---------------------------------------------------------------------------------|-----------------------------------------------------------------------------|----------------------------------------------------------------------|--------------------------------------------------------------------------------|
| Crystal                       | Rat Sinefungin                                                            | Rat Sinefungin, Tolcapone                                               | Humanised Rat apo, Sulphate                                                     | Humanised Rat SAH                                                           | Humanised Rat SAH semi-holo                                          | Humanised Rat ureido-benzamidine                                               |
| # / PDB-ID                    | <b>(7)</b> / 4P7K                                                         | <b>(8)</b> / 4PYL                                                       | <b>(9)</b> / 4PYM                                                               | <b>(10)</b> / 4PYN                                                          | <b>(11)</b> / 4PYO                                                   | <b>(12)</b> / 4PYQ                                                             |
| [Protein]                     | 13 mg/ml                                                                  | 15.5 mg/ml                                                              | 16 mg/ml                                                                        | 13 mg/ml                                                                    | 16 mg/ml                                                             | 13 mg/ml                                                                       |
| Protein buffer                | 50 mM Tris/HCl pH 7.5, 50 mM NaCl, 10 mM DTT, 2 mM MgCl <sub>2</sub>      | 20 mM BisTris/HCl pH 6.2, 100 mM NaCl, 5 mM DTT, 5 mM MgCl <sub>2</sub> | 50 mM Tris/HCl pH 7.5, 50 mM NaCl, 10 mM DTT, 2 mM MgCl <sub>2</sub>            | 50 mM Tris/HCl pH 7.5, 50 mM NaCl, 10 mM DTT, 2 mM MgCl <sub>2</sub>        | 50 mM Tris/HCl pH 7.5, 50 mM NaCl, 10 mM DTT, 2 mM MgCl <sub>2</sub> | 50 mM Tris/HCl pH 7.5, 50 mM NaCl, 10 mM DTT, 2 mM MgCl <sub>2</sub>           |
| Ligand                        | Sinefungin (50-fold molar excess) <sup>2)</sup>                           | Sinefungin, Tolcapone <sup>3)</sup>                                     | Sulphate <sup>1)</sup>                                                          | SAH (50-fold molar excess) <sup>2)</sup>                                    | SAH (10-fold molar excess) <sup>2)</sup>                             | 4 mM ligand + 2% DMSO <sup>4)</sup> , SAH (10-fold molar excess) <sup>2)</sup> |
| Reservoir                     | 1M K/Na tartrate, 0.1M Tris/HCl 7.5, 0.2M Li <sub>2</sub> SO <sub>4</sub> | 25% PEG 3350, 0.1M BisTris/HCl pH 6.5, 0.2M NaCl                        | 1.2M K/Na tartrate, 0.1M MOPS/NaOH pH 8.0, 0.2M Li <sub>2</sub> SO <sub>4</sub> | 1.2M KNaTartrat, 0.1M Tris/HCl pH 7.0, 0.2M Li <sub>2</sub> SO <sub>4</sub> | 3.5M Na formate, 0.1M CHES/NaOH pH 9.5                               | 0.1M NaOAc pH 4.5, 2.5M NaCl, 0.2M Li <sub>2</sub> SO <sub>4</sub>             |
| Drop volume / protein content | 0.5ul / 50%                                                               | 0.4ul / 50%                                                             | 0.5ul / 60%                                                                     | 0.6ul / 50%                                                                 | 0.4ul / 70%                                                          | 0.4ul / 70%                                                                    |
| Remarks                       | Seeding with SAM cocrystals                                               | -                                                                       | Seeding with SAH-cocrystals                                                     | Seeding                                                                     | -                                                                    | - / ureido-benzamidine                                                         |

<sup>1)</sup> Anion bound at carboxylate site of SAM/SAH.

<sup>2)</sup> In diluted protein, prior to concentration by ultrafiltration.

<sup>3)</sup> 1 mM in concentrated protein prior to setup.

<sup>4)</sup> In concentrated protein prior to setup.

**Table S2** Data collection and refinement statistics

| COMT Crystal                      | Human apo                             | Human apo single swap      | Human apo double swap        | Mouse apo                    | Rat apo Phosphate            | Rat apo Sulphate             | Rat Sinefungin               | rCOMT Sinefungin Tolcapone | hrCOMT apo-Sulphate          | hrCOMT SAH                 | hrCOMT SAH, semi-holo      | hrCOMT Ureido-benzamide      |
|-----------------------------------|---------------------------------------|----------------------------|------------------------------|------------------------------|------------------------------|------------------------------|------------------------------|----------------------------|------------------------------|----------------------------|----------------------------|------------------------------|
| # / PDB-ID                        | (1) / 4PYI                            | (2) / 4PYJ                 | (3) / 4PYK                   | (4) / 4P7F                   | (5) / 4P7G                   | (6) / 4P7J                   | (7) / 4P7K                   | (8) / 4PYL                 | (9) / 4PYM                   | (10) / 4PYN                | (11) / 4PYO                | (12) / 4PYQ                  |
| Detector                          | MARCCD-225                            | PILATUS 6M                 | PILATUS 6M                   | PILATUS 6M                   | MARCCD-225                   | MARCCD-225                   | MARCCD-225                   | MARCCD-225                 | PILATUS 6M                   | MARCCD-225                 | PILATUS 6M                 | PILATUS 6M                   |
| Range / $\Delta\phi$ (°)          | 125 / 1                               | 180 / 0.5                  | 180 / 1                      | 180 / 0.5                    | 120 / 0.5                    | 180 / 1                      | 180 / 1                      | 133 / 0.3                  | 120 / 0.5                    | 120 / 1                    | 180 / 0.5                  | 180 / 0.5                    |
| Mosaicity (°) <sup>0</sup>        | 0.24                                  | 0.10                       | 0.15                         | 0.15                         | 0.41                         | 0.28                         | 0.15                         | 0.82                       | 0.21                         | 0.15                       | 0.13                       | 0.27                         |
| Resolution range (Å) <sup>1</sup> | 28.8 - 1.35<br>(1.40 - 1.35)          | 40.4 - 1.9<br>(1.97 - 1.9) | 40.2 - 2.22<br>(2.30 - 2.22) | 40.8 - 1.37<br>(1.42 - 1.37) | 48.7 - 2.58<br>(2.67 - 2.58) | 45.1 - 1.45<br>(1.50 - 1.45) | 31.7 - 1.22<br>(1.26 - 1.22) | 41.8 - 2.2<br>(2.28 - 2.2) | 30.7 - 1.19<br>(1.23 - 1.19) | 31.7 - 1.2<br>(1.24 - 1.2) | 45.9 - 2.1<br>(2.17 - 2.1) | 36.4 - 1.39<br>(1.44 - 1.39) |
| 100% crit. (Å) <sup>2</sup>       | 1.38                                  | 1.91                       | 2.22                         | 1.37                         | 2.63                         | 1.45                         | 1.36                         | 2.22                       | 1.21                         | 1.20                       | 2.1                        | 1.42                         |
| Space group                       | P 1                                   | C 2 2 2 1                  | C 2 2 2 1                    | R 3 2 :H                     | P 3 2 2 1                    | P 3 1 2 1                    | P 2 1 2 1 2 1                | P 3 2 2 1                  | P 2 1 2 1 2 1                | P 2 1 2 1 2 1              | P 2 1 2 1 2 1              | R 3 :H                       |
| Cell (Å / °)                      | 31.6, 42.6, 43.7 / 115.0, 95.4, 109.0 | 54.9, 67.2, 128.8          | 54.8, 66.8, 128.0            | 123.8, 88.4                  | 71.6, 393.4                  | 56.3, 119.1                  | 33.2, 61.2, 104.8            | 49.8, 167.5                | 33.3, 61.6, 104.2            | 33.3, 61.2, 104.8          | 58.4, 60.38, 148.4         | 125.4, 77.3                  |
| Total reflections                 | 101421<br>(8950)                      | 125270<br>(12700)          | 78926<br>(7716)              | 544575<br>(51225)            | 179257<br>(8420)             | 390523<br>(37495)            | 302928<br>(1696)             | 69025<br>(3486)            | 288810<br>(27852)            | 305666<br>(23211)          | 205887<br>(20888)          | 464034<br>(46477)            |
| Unique reflections                | 38358<br>(3366)                       | 18911<br>(1849)            | 11951<br>(1172)              | 54274<br>(5362)              | 36241<br>(3204)              | 39464<br>(3864)              | 48898<br>(871)               | 12916<br>(1257)            | 68613<br>(6699)              | 67597<br>(6448)            | 31280<br>(3068)            | 91065<br>(9131)              |
| Multiplicity                      | 2.6 (2.7)                             | 6.6 (6.9)                  | 6.6 (6.6)                    | 10.0 (9.6)                   | 4.9 (2.6)                    | 9.9 (9.7)                    | 6.2 (1.9)                    | 5.3 (2.8)                  | 4.2 (4.2)                    | 4.5 (3.6)                  | 6.6 (6.8)                  | 5.1 (5.1)                    |
| Completeness                      | 92.83                                 | 98.60                      | 99.83                        | 99.65                        | 94.84                        | 99.80                        | 75.74                        | 99.65                      | 98.72                        | 99.46                      | 99.58                      | 99.67                        |

|                                |                    |                    |                    |                    |                    |                    |                    |                    |                    |                    |                    |                    |
|--------------------------------|--------------------|--------------------|--------------------|--------------------|--------------------|--------------------|--------------------|--------------------|--------------------|--------------------|--------------------|--------------------|
| (%)                            | (81.84)            | (96.40)            | (99.83)            | (99.11)            | (77.52)            | (100.00)           | (13.75)            | (97.90)            | (97.48)            | (96.43)            | (99.64)            | (98.96)            |
| Mean I/ $\sigma$ (I)           | 6.75 (1.61)        | 10.76<br>(1.27)    | 11.55<br>(1.53)    | 14.81<br>(0.86)    | 16.13<br>(1.54)    | 10.93<br>(1.87)    | 28.73<br>(2.42)    | 10.12<br>(1.77)    | 11.22<br>(1.08)    | 10.28<br>(1.50)    | 10.24<br>(1.40)    | 9.83 (1.49)        |
| Wilson B ( $\text{\AA}^2$ )    | 10.8               | 36.4               | 42.5               | 18.7               | 58.2               | 14.6               | 9.6                | 34.8               | 13.7               | 8.9                | 37.5               | 19.0               |
| R-merge                        | 0.118              | 0.074              | 0.104              | 0.069              | 0.235              | 0.117              | 0.035              | 0.089              | 0.059              | 0.085              | 0.113              | 0.075              |
| R-meas                         | 0.147              | 0.081              | 0.113              | 0.073              | 0.256              | 0.124              | 0.038              | 0.098              | 0.067              | 0.096              | 0.123              | 0.084              |
| CC <sub>1/2</sub> <sup>3</sup> | 0.989<br>(0.287)   | 0.998<br>(0.737)   | 0.998<br>(0.672)   | 0.999<br>(0.261)   | 0.968<br>(0.676)   | 0.998<br>(0.64)    | 1<br>(0.769)       | 0.997<br>(0.789)   | 0.999<br>(0.406)   | 0.998<br>(0.496)   | 0.998<br>(0.708)   | 0.997<br>(0.506)   |
| CC*                            | 0.997<br>(0.668)   | 1<br>(0.921)       | 1<br>(0.896)       | 1<br>(0.644)       | 0.992<br>(0.898)   | 0.999<br>(0.883)   | 1<br>(0.932)       | 0.999<br>(0.939)   | 1<br>(0.76)        | 0.999<br>(0.814)   | 1<br>(0.911)       | 0.999<br>(0.82)    |
| R-work <sup>3</sup>            | 0.1621<br>(0.3100) | 0.1977<br>(0.3607) | 0.1725<br>(0.2845) | 0.1253<br>(0.3242) | 0.2214<br>(0.3207) | 0.1690<br>(0.2603) | 0.1124<br>(0.2026) | 0.1883<br>(0.2980) | 0.1365<br>(0.2891) | 0.1269<br>(0.2787) | 0.1888<br>(0.3254) | 0.1320<br>(0.3436) |
| R-free <sup>3</sup>            | 0.2131<br>(0.3494) | 0.2629<br>(0.4066) | 0.2435<br>(0.3037) | 0.1678<br>(0.3586) | 0.2672<br>(0.3706) | 0.1993<br>(0.3256) | 0.1480<br>(0.2652) | 0.2424<br>(0.3569) | 0.1701<br>(0.2956) | 0.1539<br>(0.3335) | 0.2331<br>(0.3934) | 0.1612<br>(0.3592) |
| # molecules /<br>a.u.          | 1                  | 1                  | 1                  | 1                  | 4                  | 1                  | 1                  | 1                  | 1                  | 1                  | 2                  | 2                  |
| # non-H atoms                  | 1804               | 1693               | 1723               | 1980               | 6843               | 1972               | 2176               | 1765               | 2086               | 2136               | 3524               | 3667               |
| protein                        | 1666               | 1619               | 1670               | 1759               | 6725               | 1750               | 1836               | 1677               | 1762               | 1809               | 3414               | 3383               |
| ligands                        | 1                  | 3                  | 3                  | 31                 | 22                 | 5                  | 17                 | 48                 | 6                  | 4                  | 3                  | 73                 |
| water                          | 137                | 71                 | 50                 | 187                | 96                 | 217                | 317                | 40                 | 313                | 317                | 107                | 211                |
| # residues                     | 207                | 208                | 214                | 213                | 855                | 217                | 219                | 213                | 217                | 219                | 434                | 426                |
| RMS (bonds)                    | 0.009              | 0.006              | 0.008              | 0.010              | 0.014              | 0.005              | 0.009              | 0.008              | 0.007              | 0.010              | 0.007              | 0.014              |
| RMS (angles)                   | 1.23               | 0.98               | 1.07               | 1.31               | 1.77               | 1.13               | 1.31               | 1.14               | 1.21               | 1.30               | 1.06               | 1.30               |
| Ramachandran<br>favoured (%)   | 98                 | 98                 | 98                 | 96                 | 93                 | 97                 | 97                 | 96                 | 96                 | 97                 | 96                 | 95                 |

|                           |       |       |       |       |       |       |       |       |       |       |       |       |
|---------------------------|-------|-------|-------|-------|-------|-------|-------|-------|-------|-------|-------|-------|
| Ramachandran outliers (%) | 0     | 0     | 0     | 0.44  | 0.12  | 0     | 0     | 0     | 0     | 0     | 0.24  | 0.47  |
| Clash score               | 1.48  | 3.08  | 3.29  | 2.23  | 3.93  | 1.13  | 2.68  | 5.57  | 1.70  | 1.10  | 3.66  | 3.63  |
| <B> (Å <sup>2</sup> )     | 18.90 | 50.90 | 52.60 | 26.50 | 70.30 | 20.80 | 13.90 | 48.30 | 18.30 | 12.80 | 56.10 | 19.90 |
| protein.                  | 17.90 | 51.00 | 52.70 | 24.80 | 70.60 | 19.50 | 11.40 | 48.70 | 16.00 | 10.70 | 56.40 | 19.30 |
| ligands                   | 13.20 | 47.20 | 49.90 | 50.90 | 70.20 | 13.80 | 25.30 | 41.10 | 20.10 | 16.90 | 86.00 | 33.90 |
| solvent                   | 30.90 | 49.50 | 50.10 | 37.40 | 52.50 | 31.30 | 27.30 | 39.50 | 31.30 | 24.50 | 46.40 | 25.60 |

<sup>0)</sup> As defined in XDS (Kabsch, 2010).

<sup>1)</sup> Values in parenthesis correspond to the highest resolution shell.

<sup>2)</sup> The 100% criterion was calculated using SFTOOLS (Winn *et al.*, 2011) and represents the resolution in Å of a 100% completed hypothetical data set with the same number of reflections as the measured data.

<sup>3)</sup> R-factors and correlation coefficients were calculated using PHENIX (Zwart *et al.*, 2008). R-values and CC<sub>1/2</sub> are defined in (Diederichs & Karplus, 1997) and (Karplus & Diederichs, 2012), respectively.

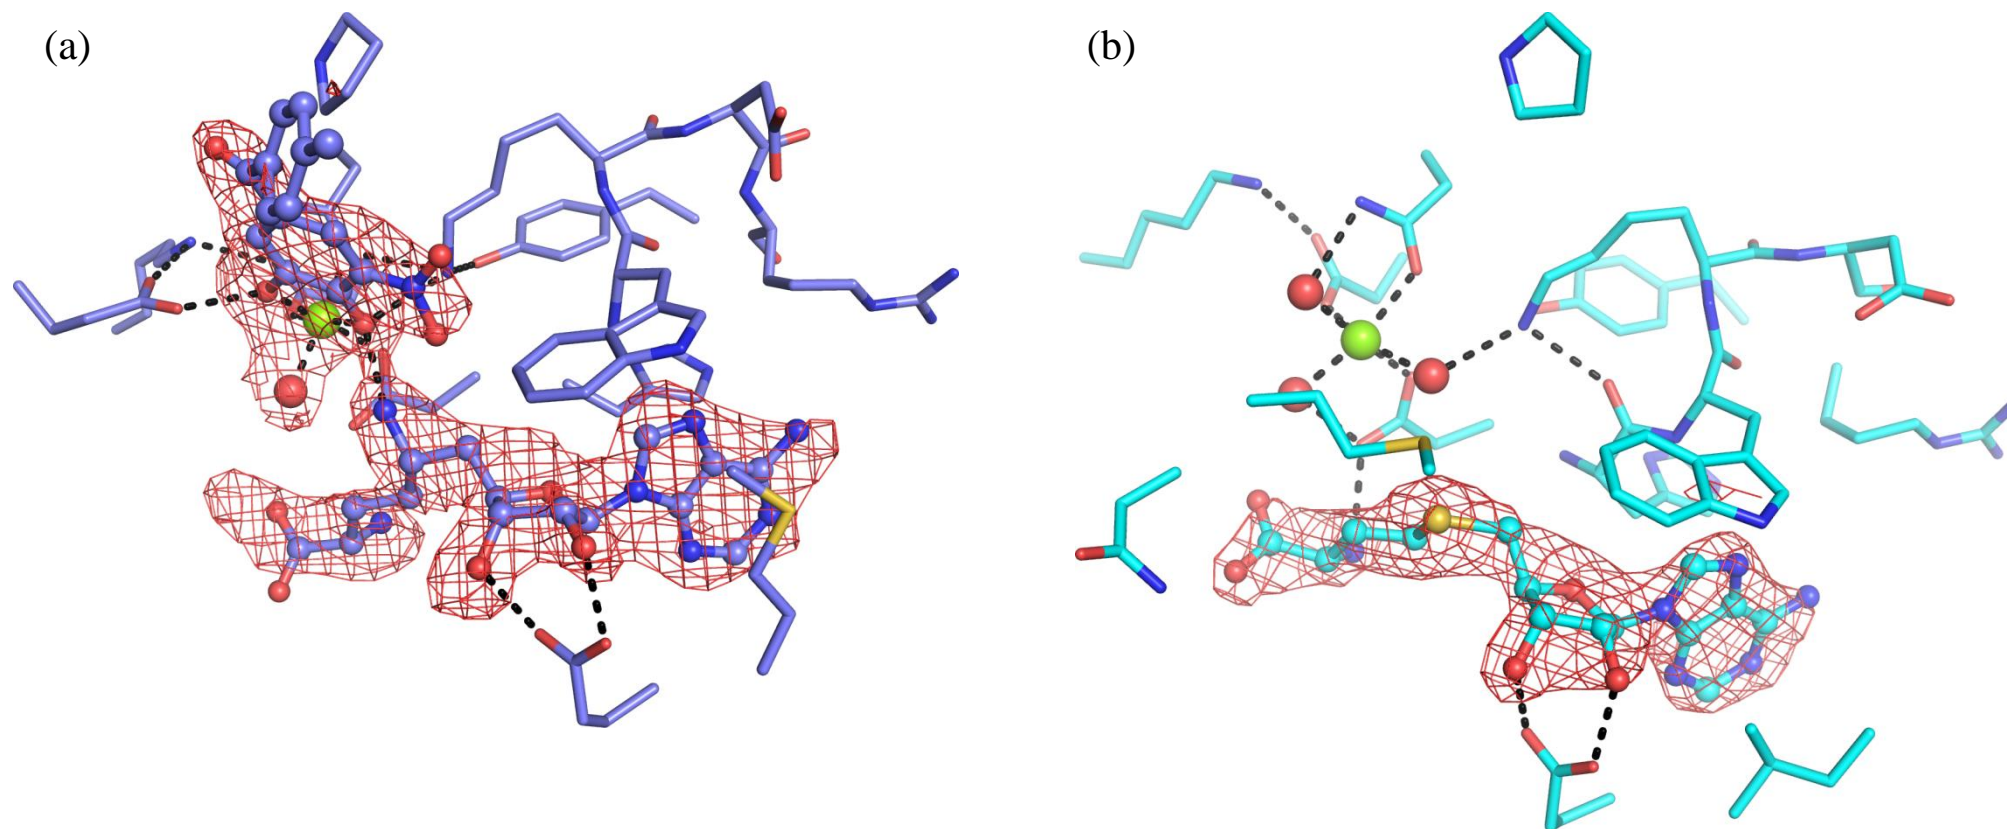

**Figure S1** Omit maps of selected ligands, contoured at 3 rmsd and coloured red. (a) Structure **(8)** with sinefungin and tolcapone. (b) Structure **(11b)** with  $\text{Mg}^{2+}$  and SAH bound. The orientation is the same as in Fig. 6a and b.

```

hCOMT   52  GDTKEQRILNHVLQHAEPGNAQSVLEAIDTYCEQKEWAMNVGDKKGGKIVDAVIQEHQPSVLLELGAYCGYSAVRMARLLS
          |...|:|...:|.|.|.|.:...:|..:|.....|:...:|..||:|...:|..|:..|...||.|.
hCOMT2  75  GLRIEERAFSYVLTHALPGDPGHILTTLDHWSSRCEYLSHMGPKVQILMRLVEEKAPACVLELGTYCGYSTLLIARALP

hCOMT   132  PGARLITIEI[NPDCAAITQRMVDFAGVKD-KVTLVVGASQDIIPQLKKKYDVTLDMVFLDHWKDRYLPTLLLEECGLL
          ||.|.:|:|..:|.||:.....|..:. .|.:||:|:|..|:..:|.....|:|.|.....||..|..|...|
hCOMT2  155  PGGRLLTVER[DPRTAAVAEKLIRLAGFDEHMVELIVGSSEDEVIPCLRTOYQLSRADLVLLAHRPCYLRDLQLLEAHALL

hCOMT   211  RKGTVLLAD[NVICPGAPDFLAHVRGSSCFEC-THYQS[FLE]YREVVDGLEKAIYKGGP 272      38.2 % id.
          ..|..:|..:|:..|...|.|:.....:|. |:.....:.....|:.....|.||
hCOMT2  225  PAGATVLA[D]HVLFPGAPRFLQYAKSCGRYRCLHHTGLP[F]FPAIKDGIAQLTYAGPG 291      60.8 % sim.

```

**Figure S2** Sequence alignment of the catalytic domains of human COMT and COMT2. The N-terminal trans-membrane sequences were ignored for the alignment. Sequence numbering for COMT is shifted by fourteen with respect to COMT2. Percent identity and similarity between the sequences are indicated at the end of the alignment. Residues in the adenine and Mg<sup>2+</sup> binding sites are highlighted with green and cyan backgrounds, respectively. The catalytic lysine residue in COMT and its replacement as proline in COMT2 have a yellow background. A magenta background highlights the residue that binds to the ribose hydroxyl groups (Glu242 in COMT, Asp274 in COMT2).
